# Supplementary figures and images for: Rewiring MAP kinases in Saccharomyces cerevisiae to regulate novel targets through ubiquitination
Source: eLife journal article supplement (doi:10.7554/elife.15200), 2016-08-15

Control strain

Test strain

$\alpha$ -factor

-      -      +      +

-      -      +      +

MG132

-      +      -      +

-      +      -      +

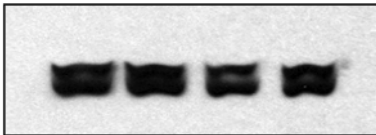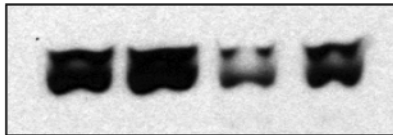

Supplement: supp [file elife_poa_e15200_Figure1_Supplement_2.pdf › elife_poa_e15200_Figure1_Supplement_2.pdf]

## Untreated

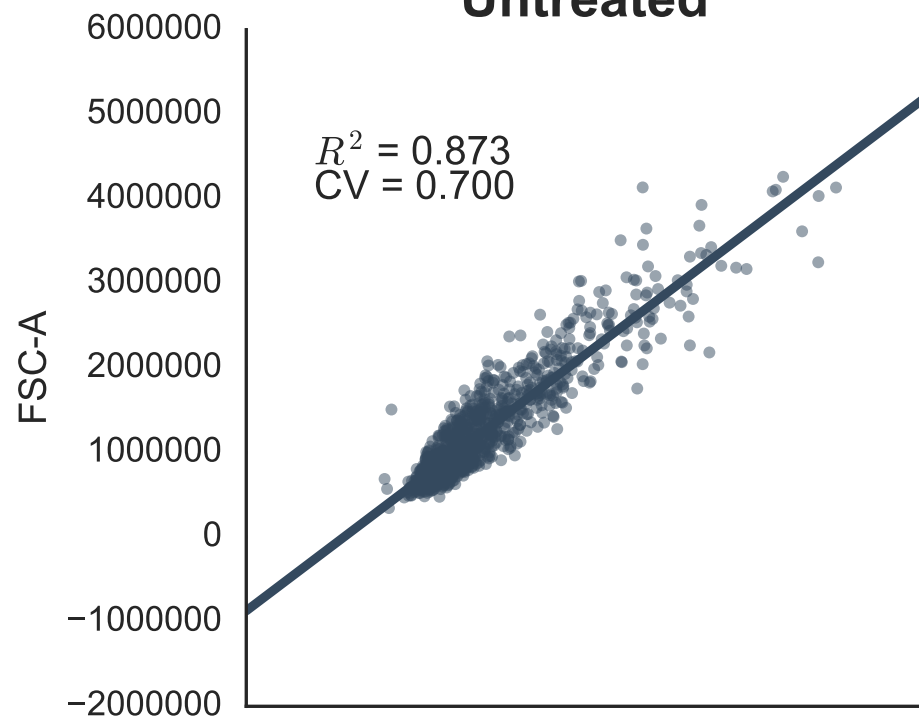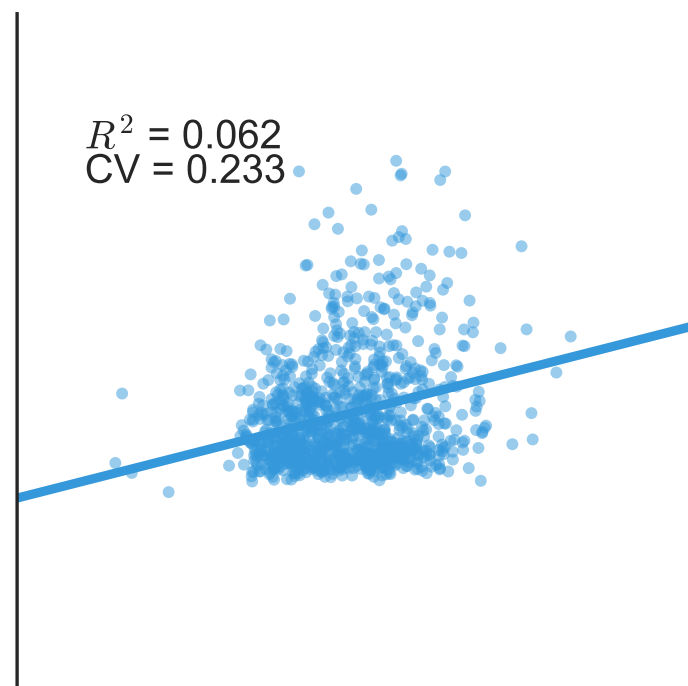

## $\alpha$ -factor, 2 hours

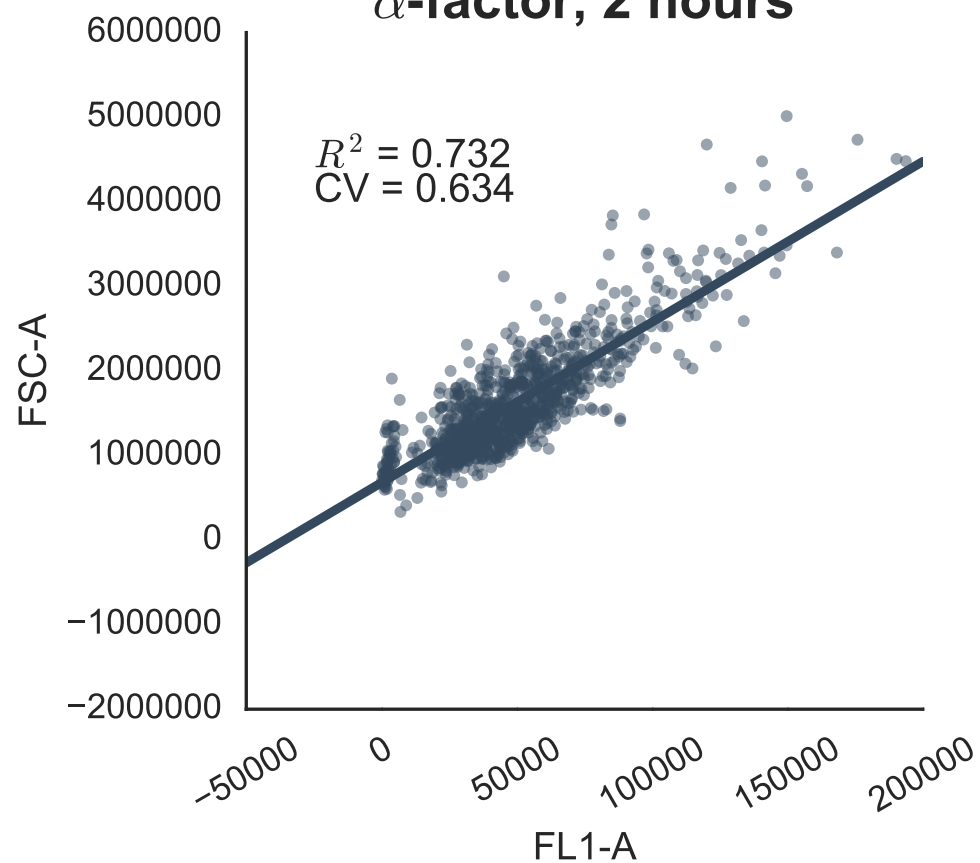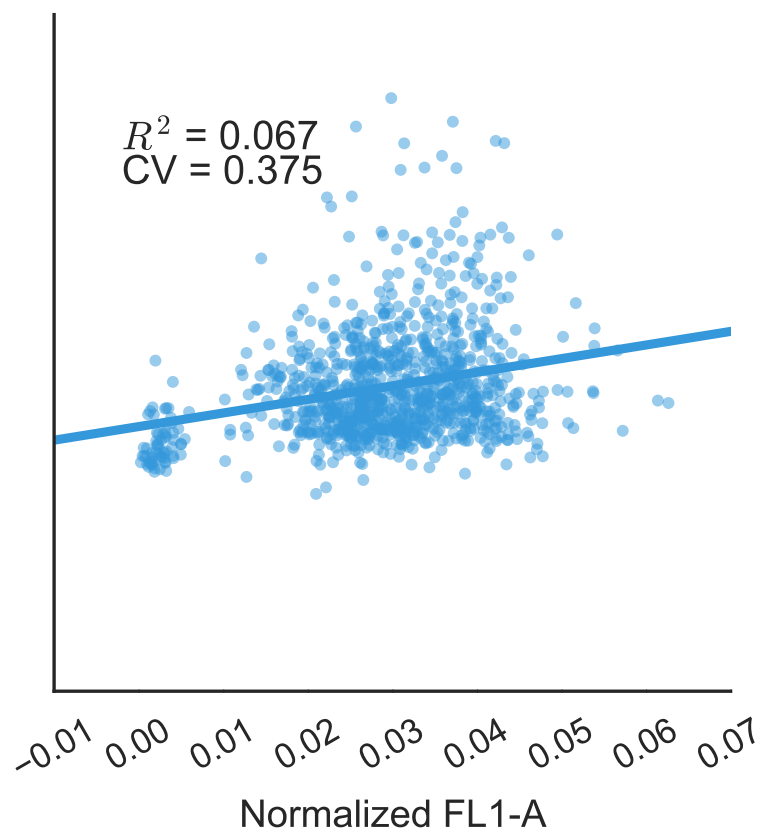

Supplement: supp [file elife_poa_e15200_Figure_1_Supplement_1.pdf › elife_poa_e15200_Figure_1_Supplement_1.pdf]

Fus3-mPDZ & YFP-Tec1-PDZ ligand

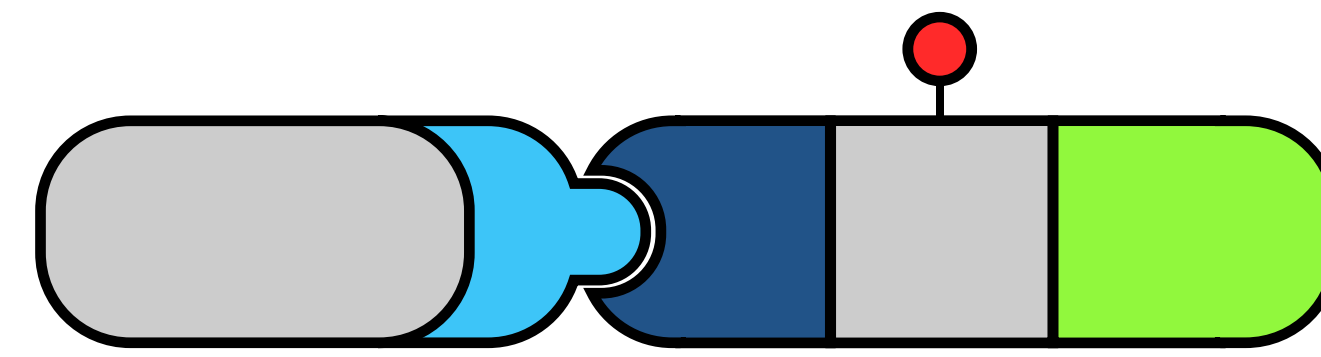

mPDZ - PDZ ligand

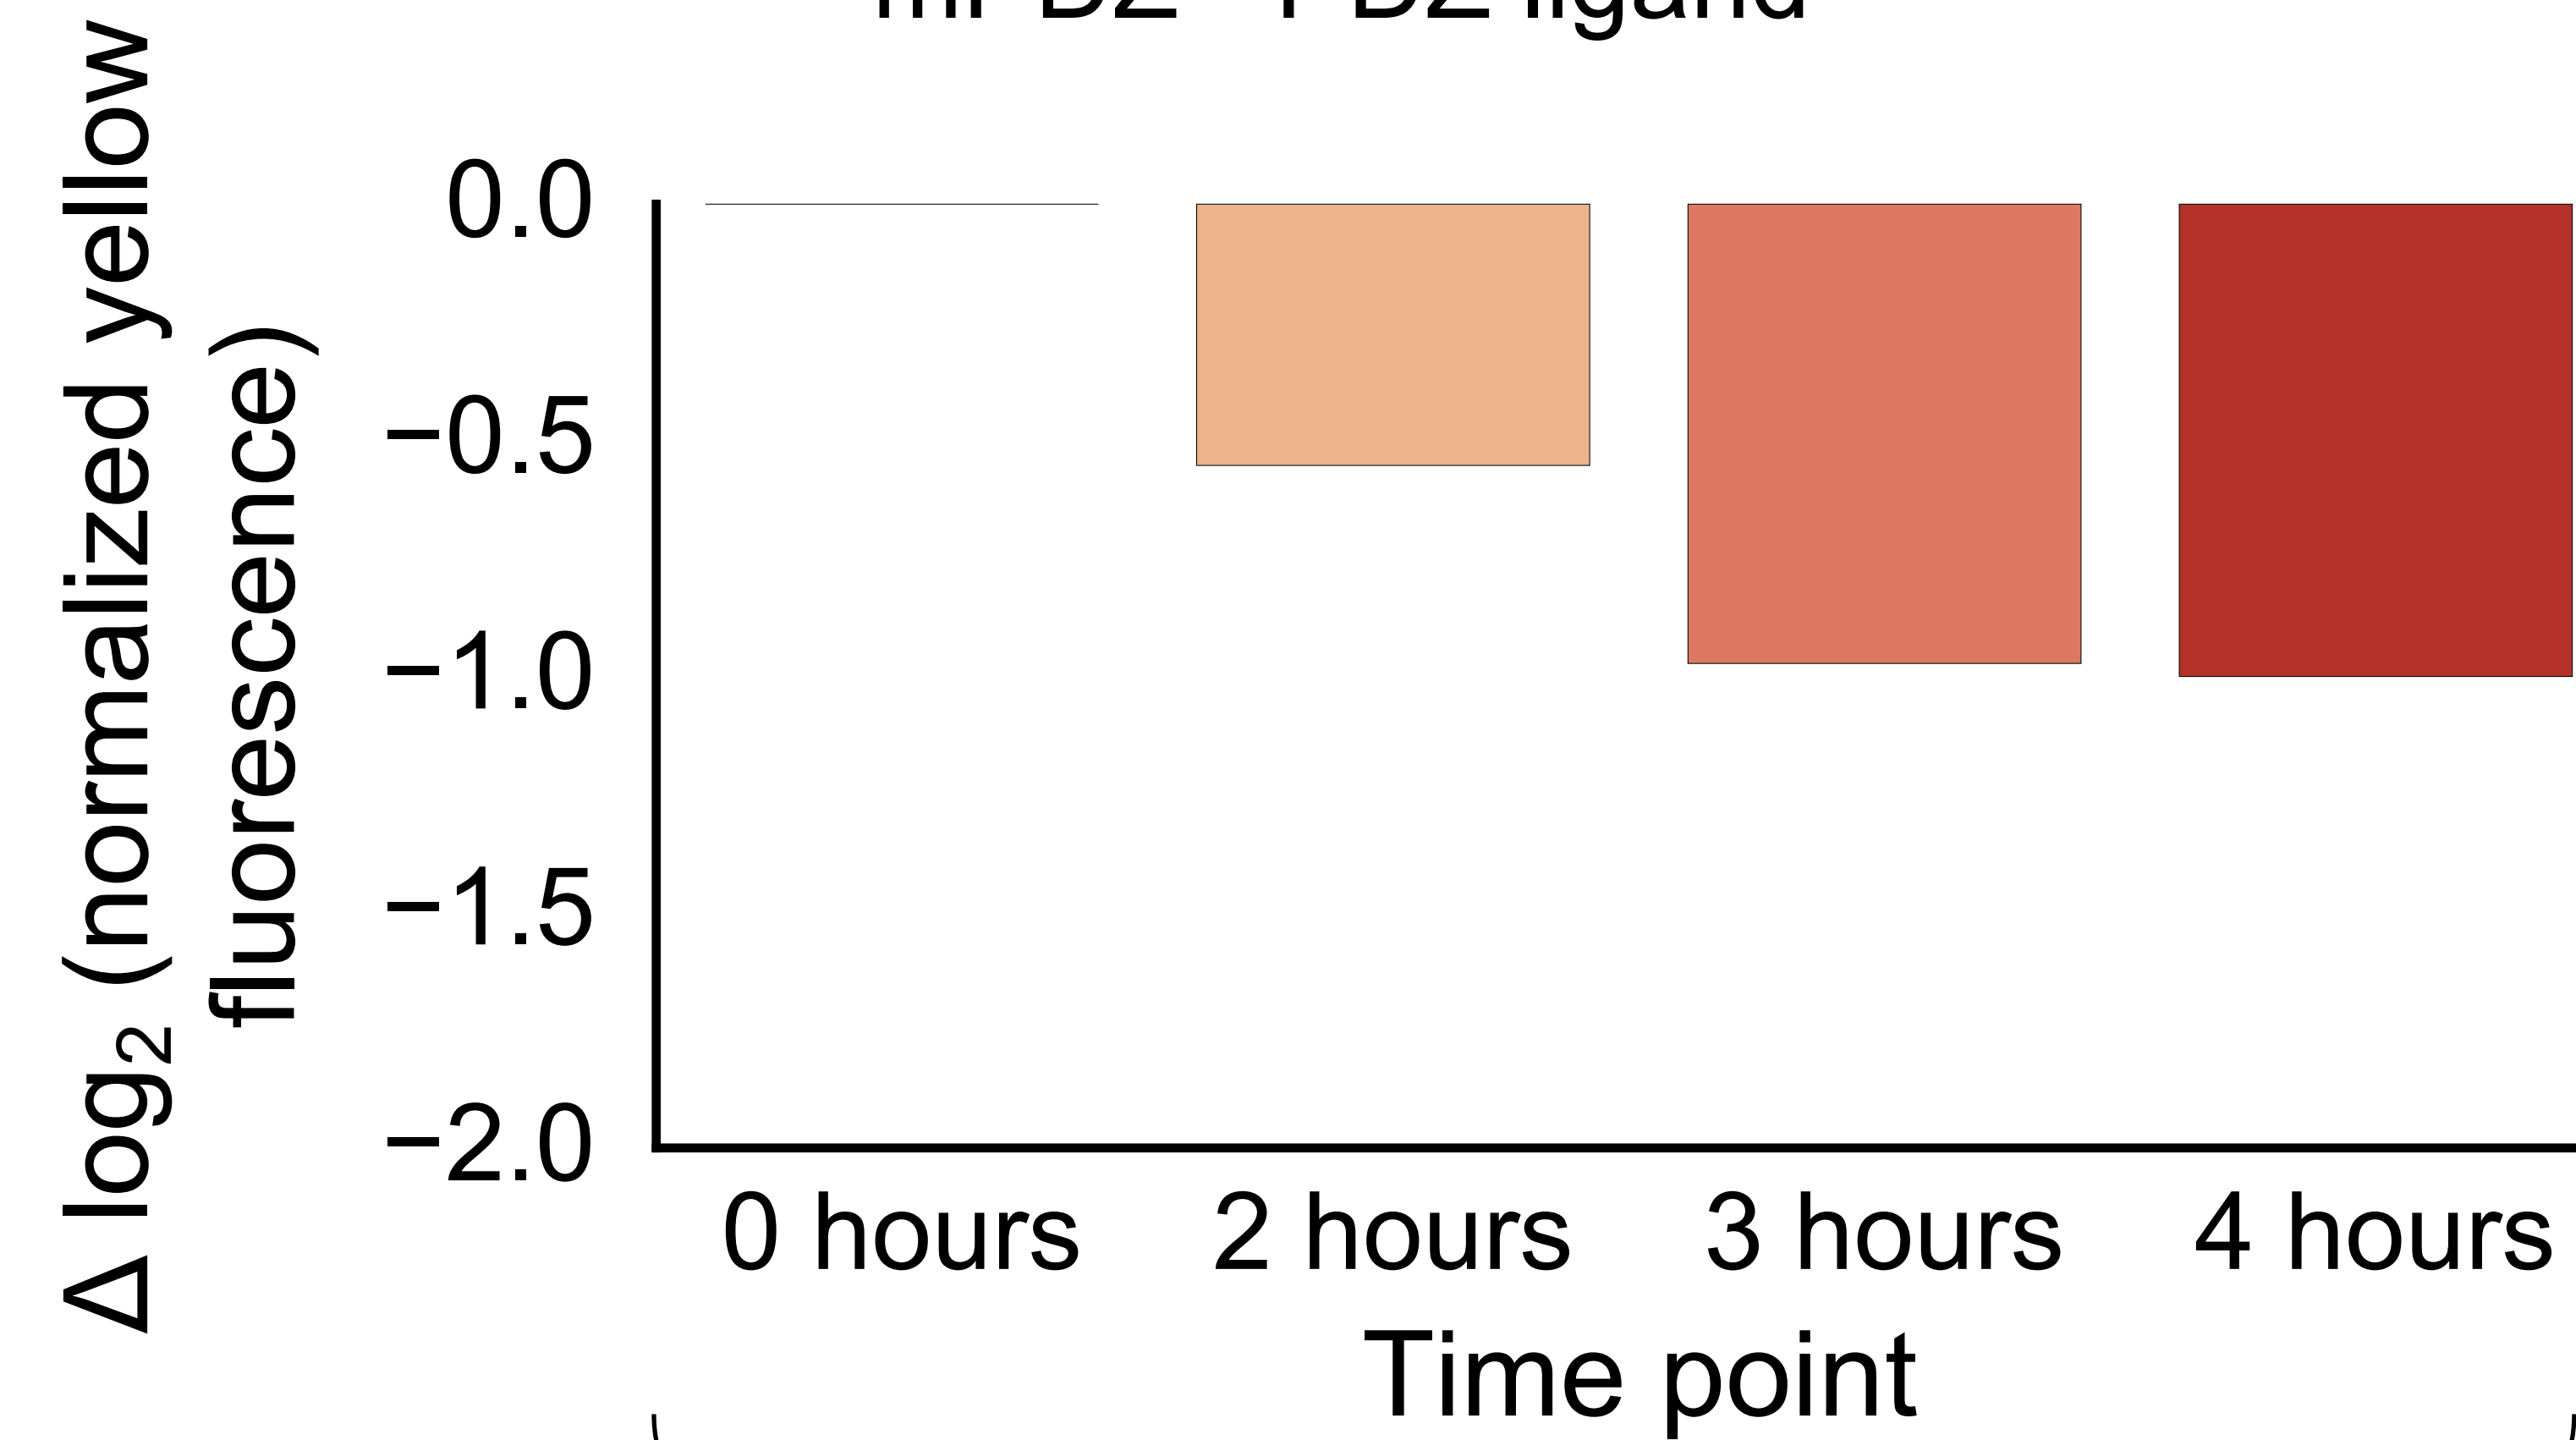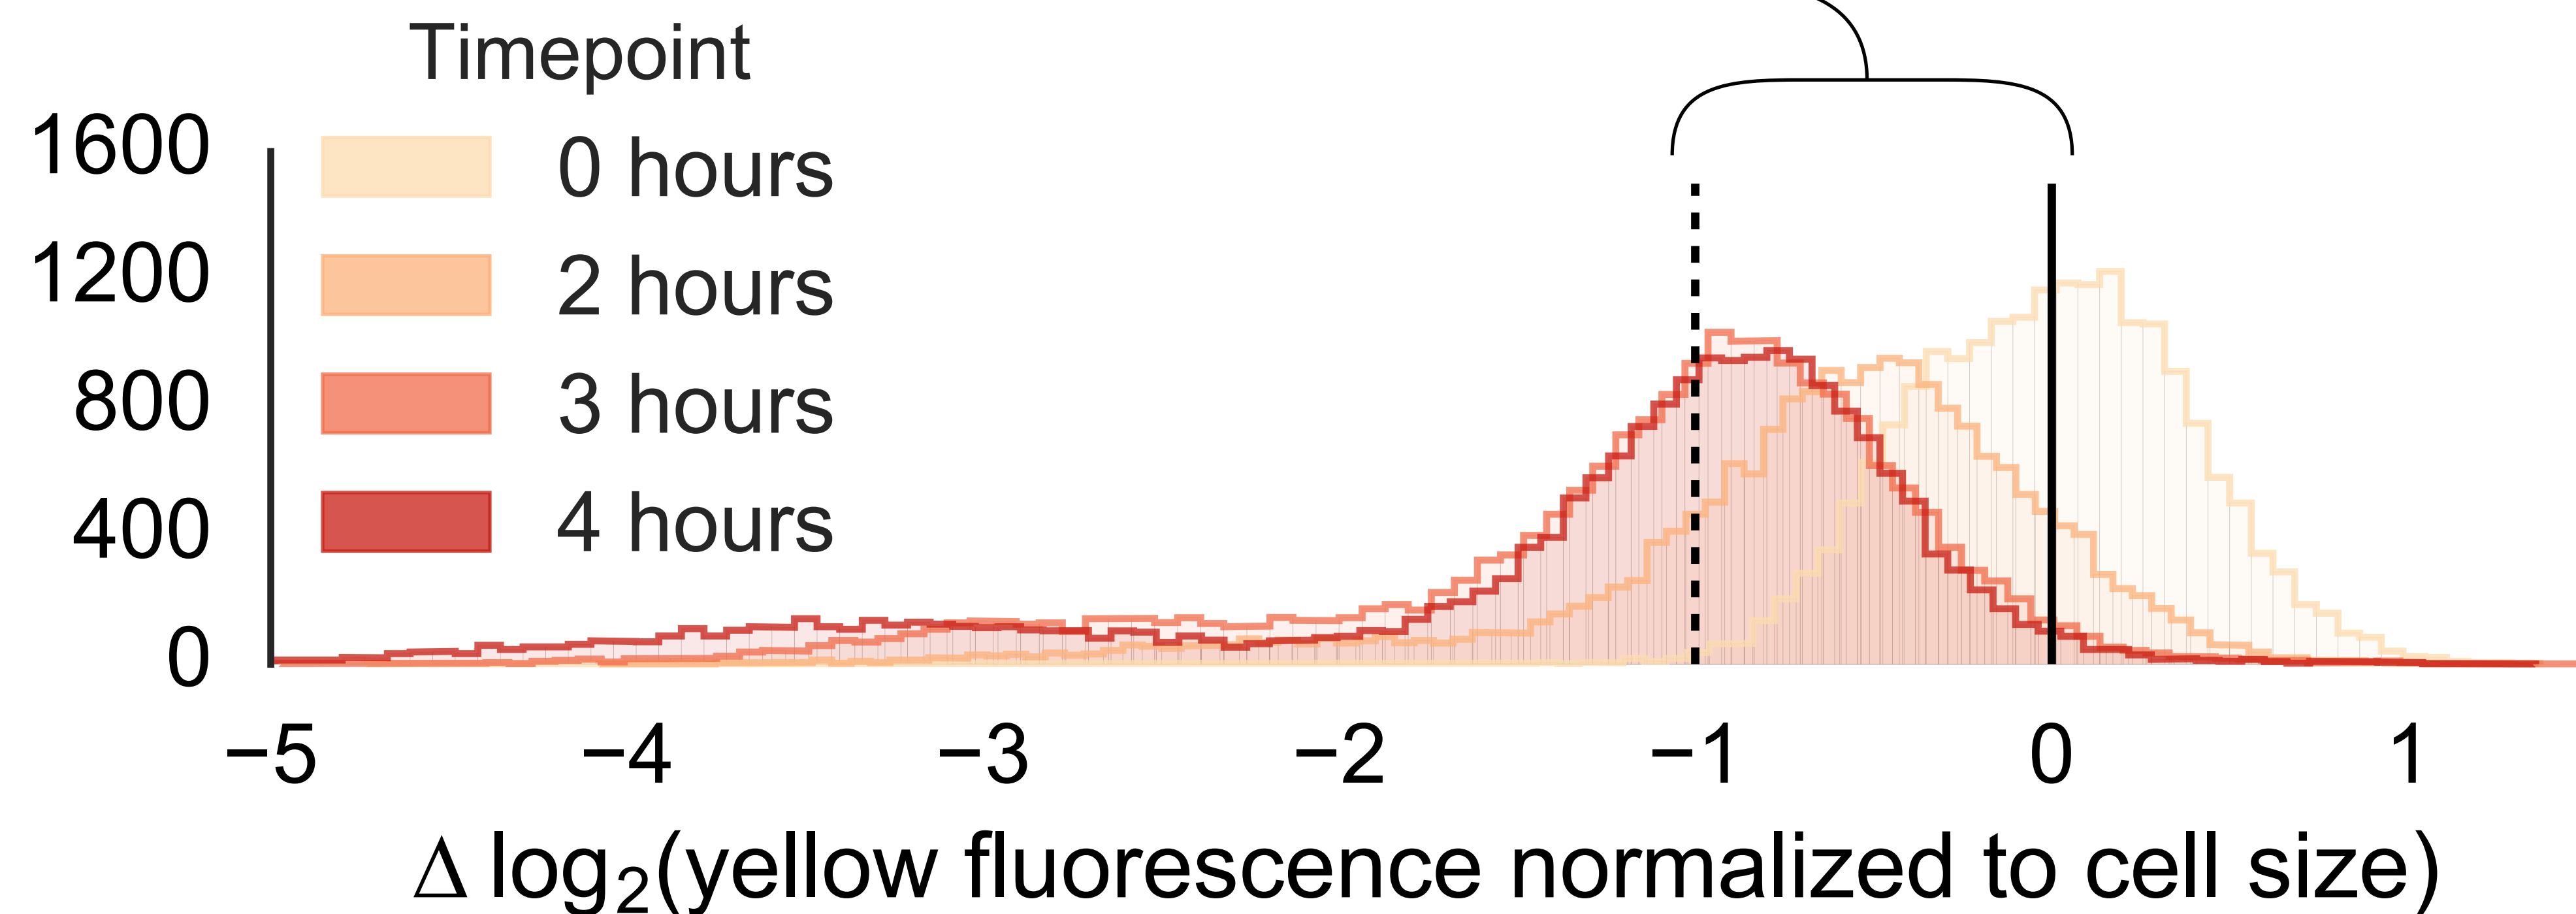

Fus3-PDZ ligand & YFP-Tec1-mPDZ

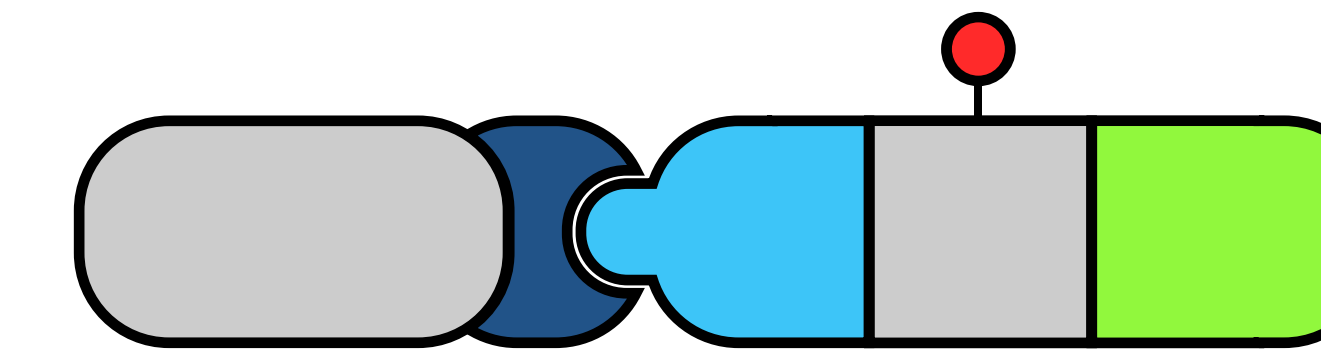

PDZ ligand - mPDZ

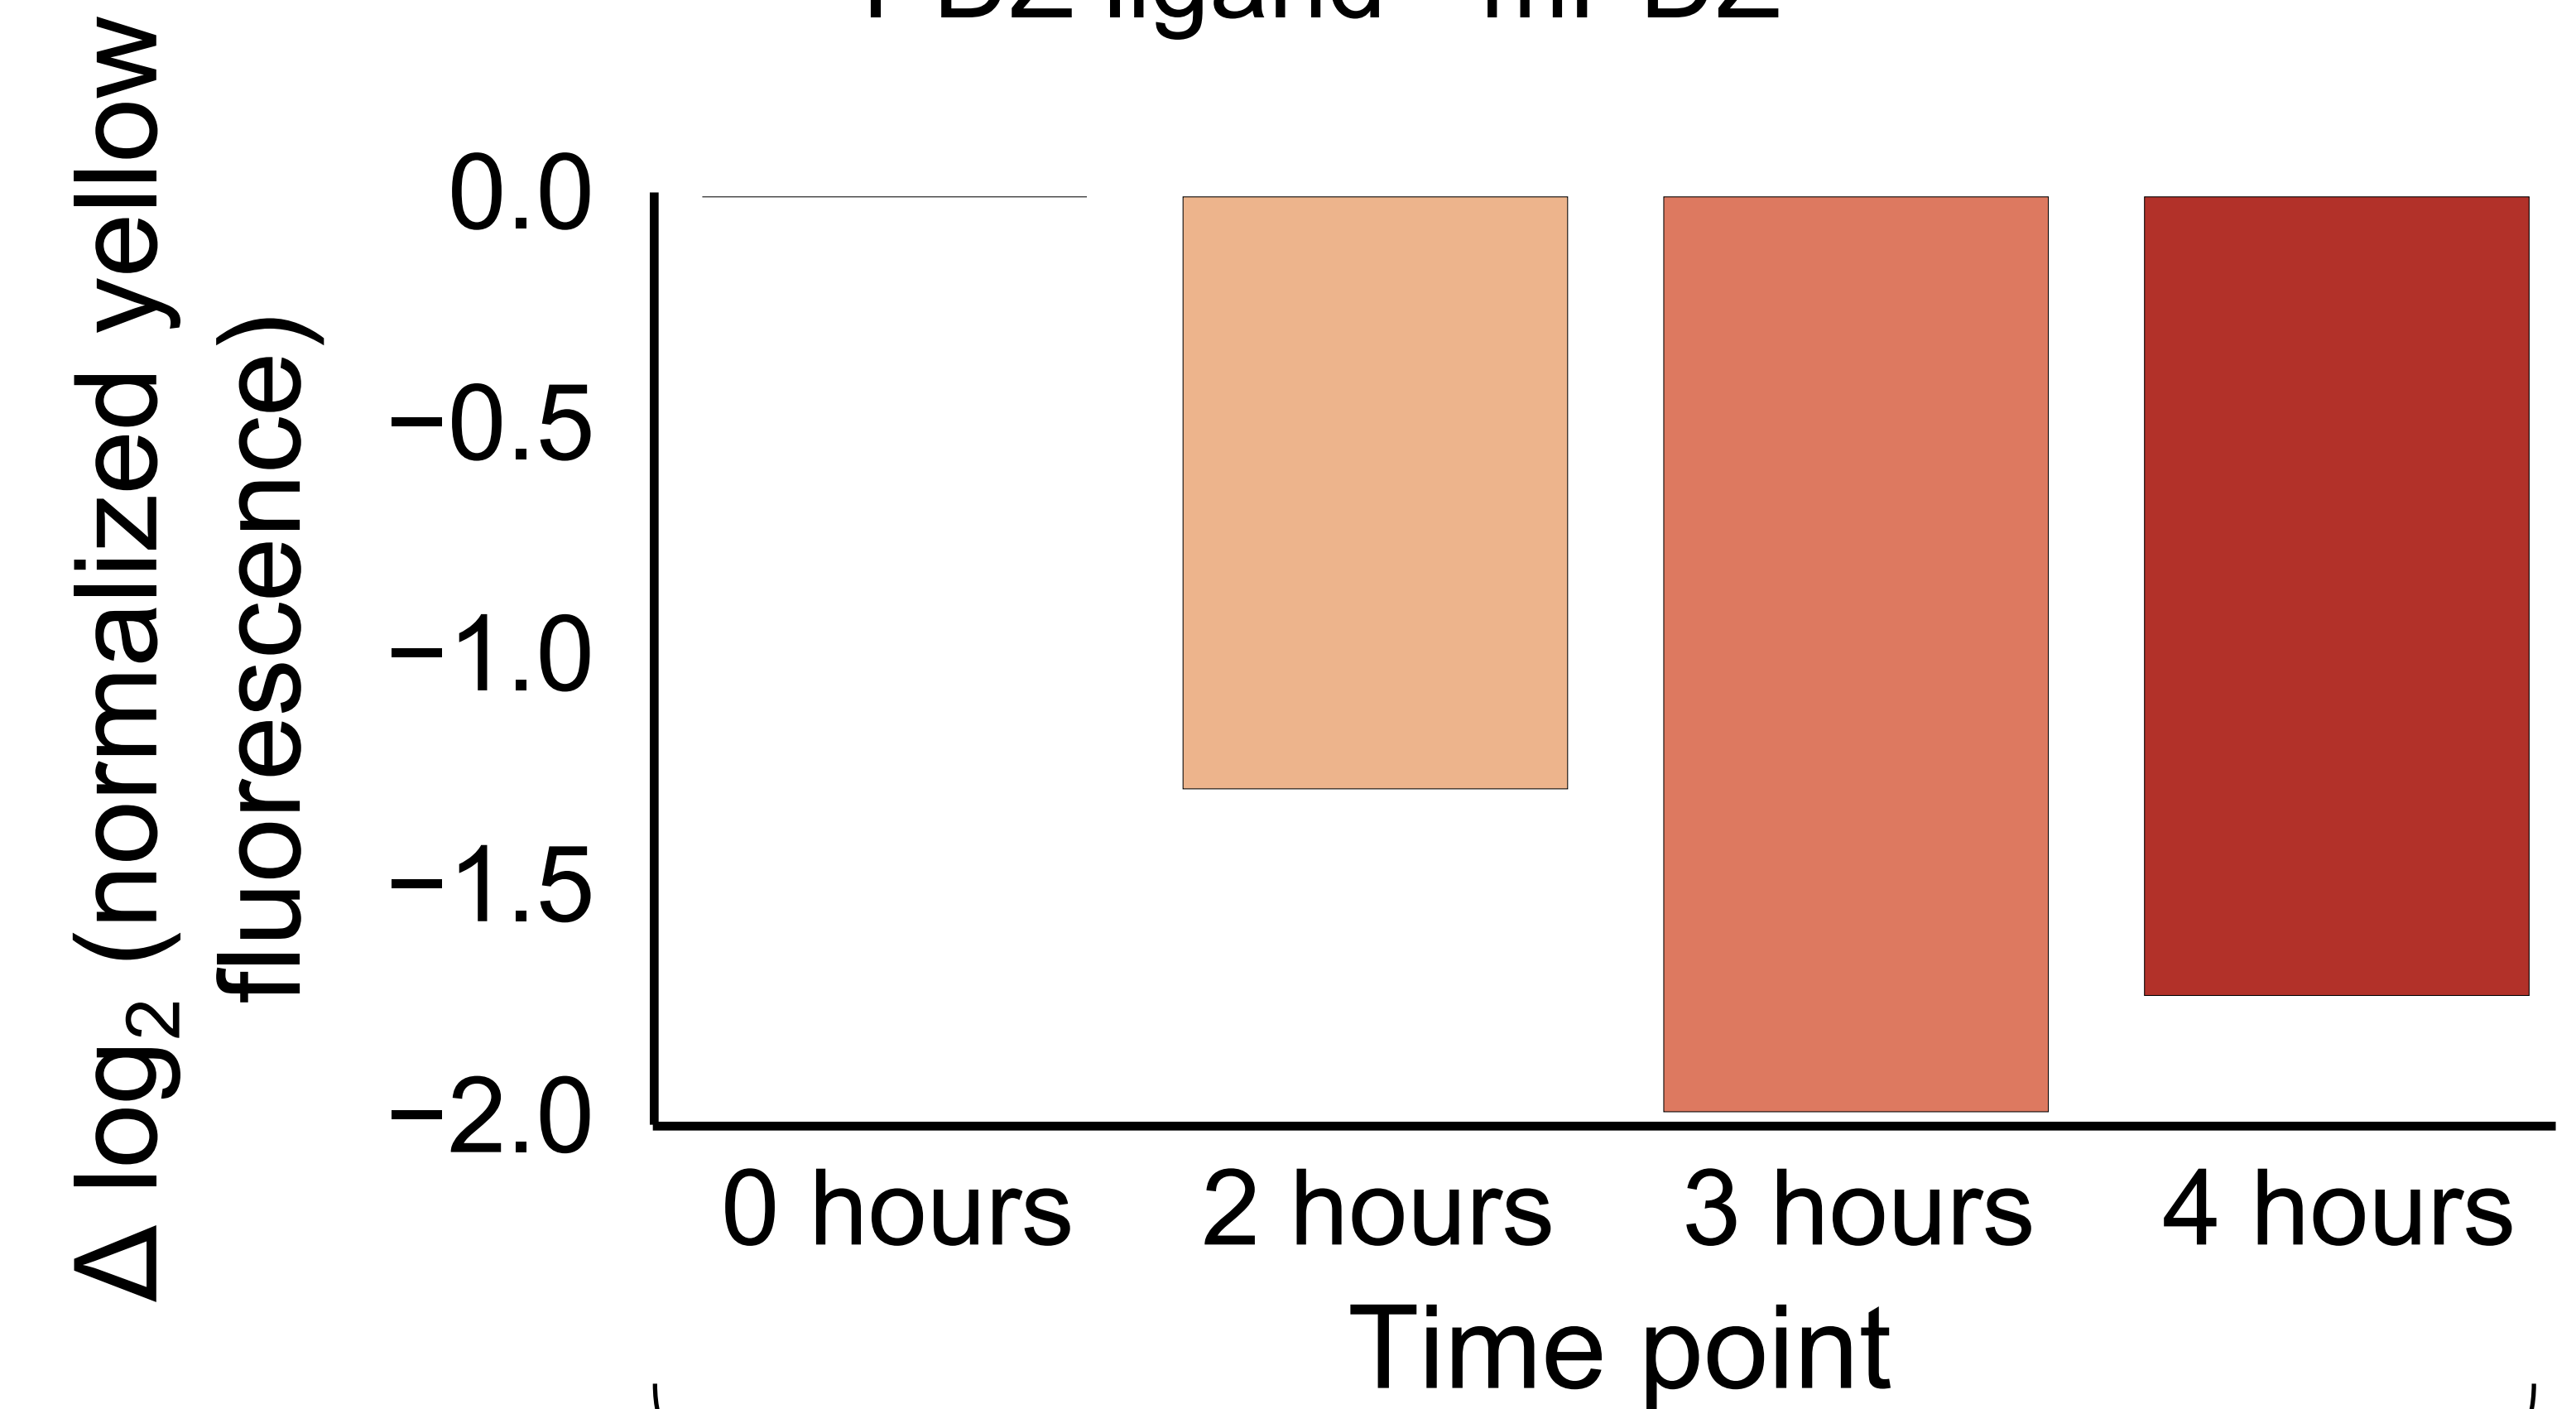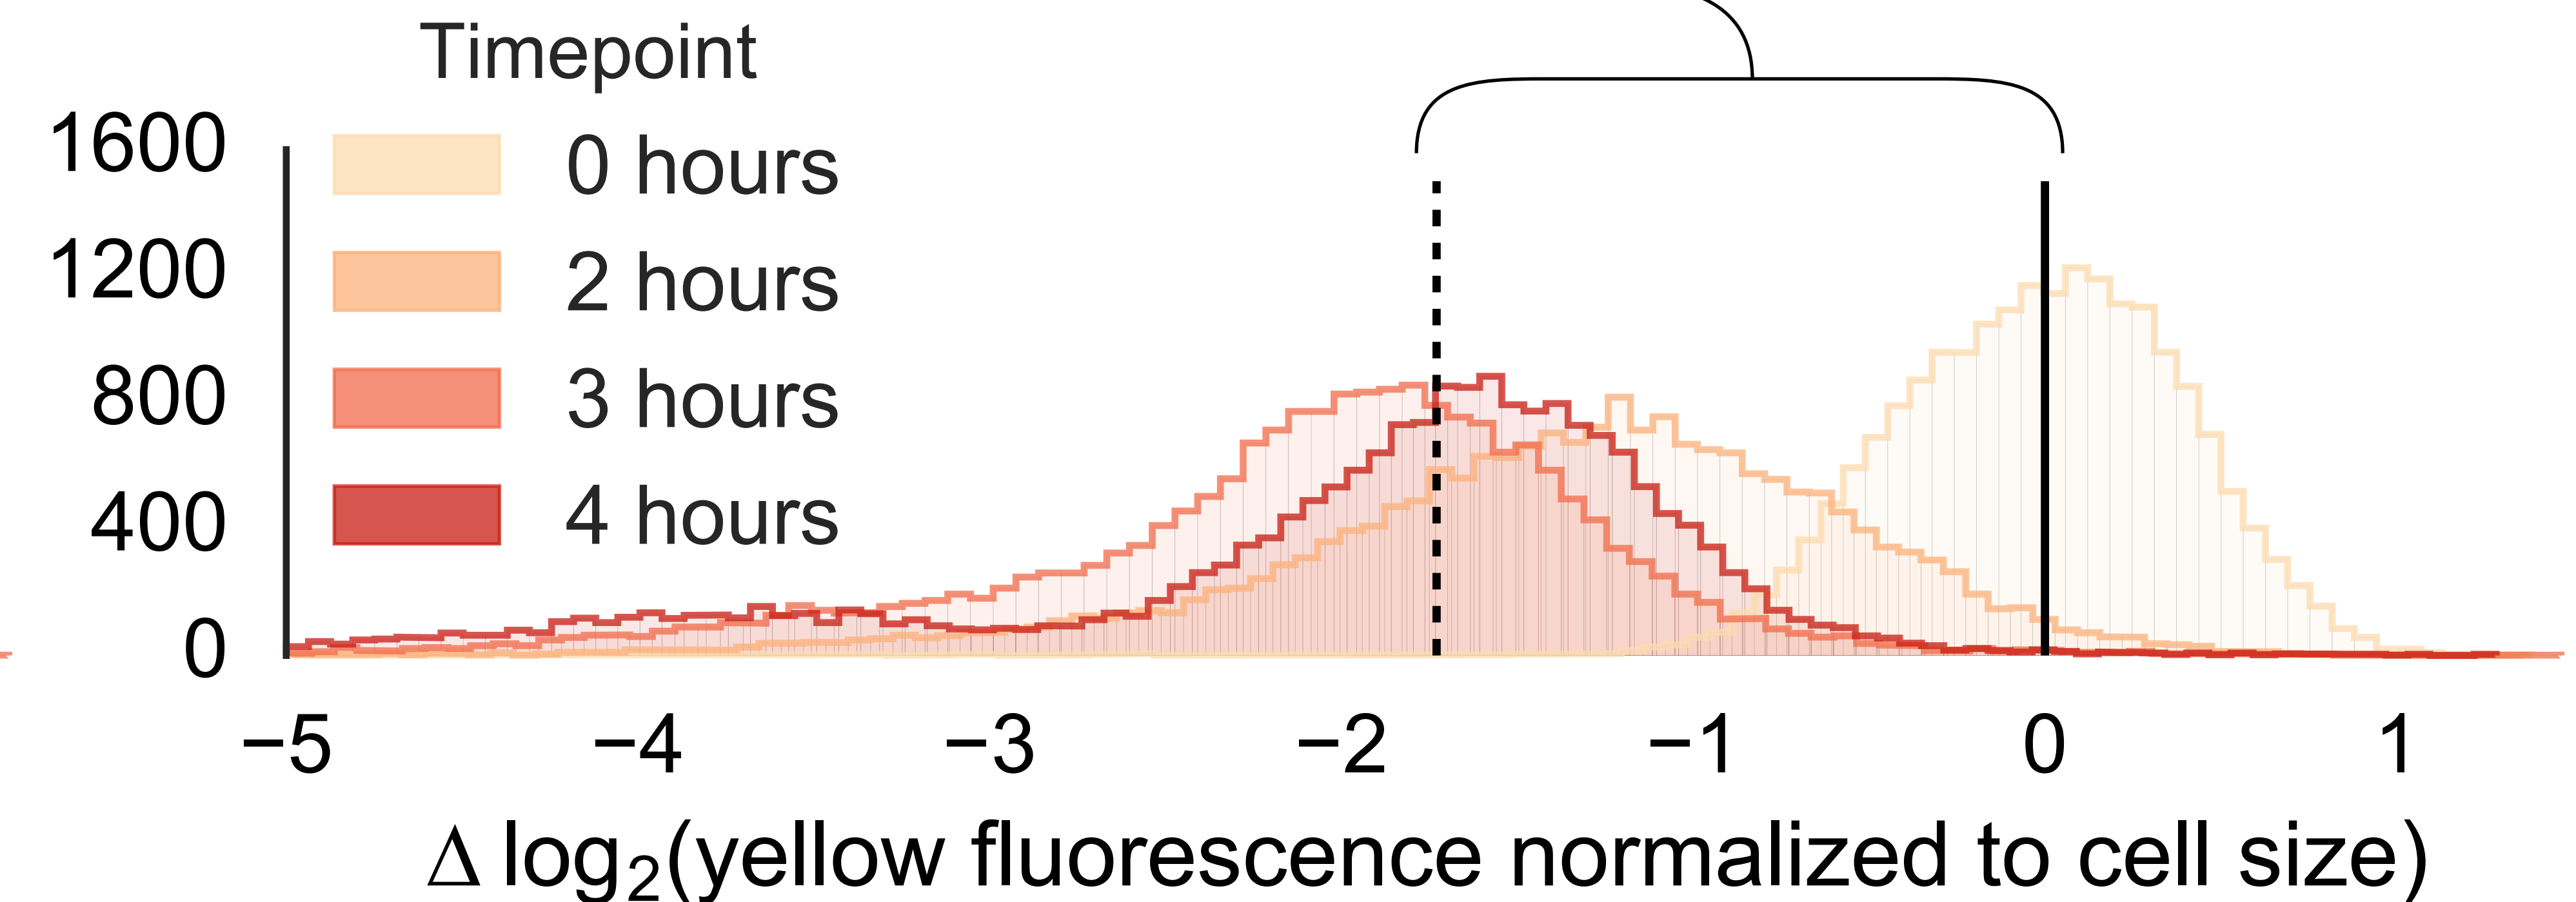

Supplement: supp [file elife_poa_e15200_Figure_1_Supplement_3.pdf › elife_poa_e15200_Figure_1_Supplement_3.pdf]

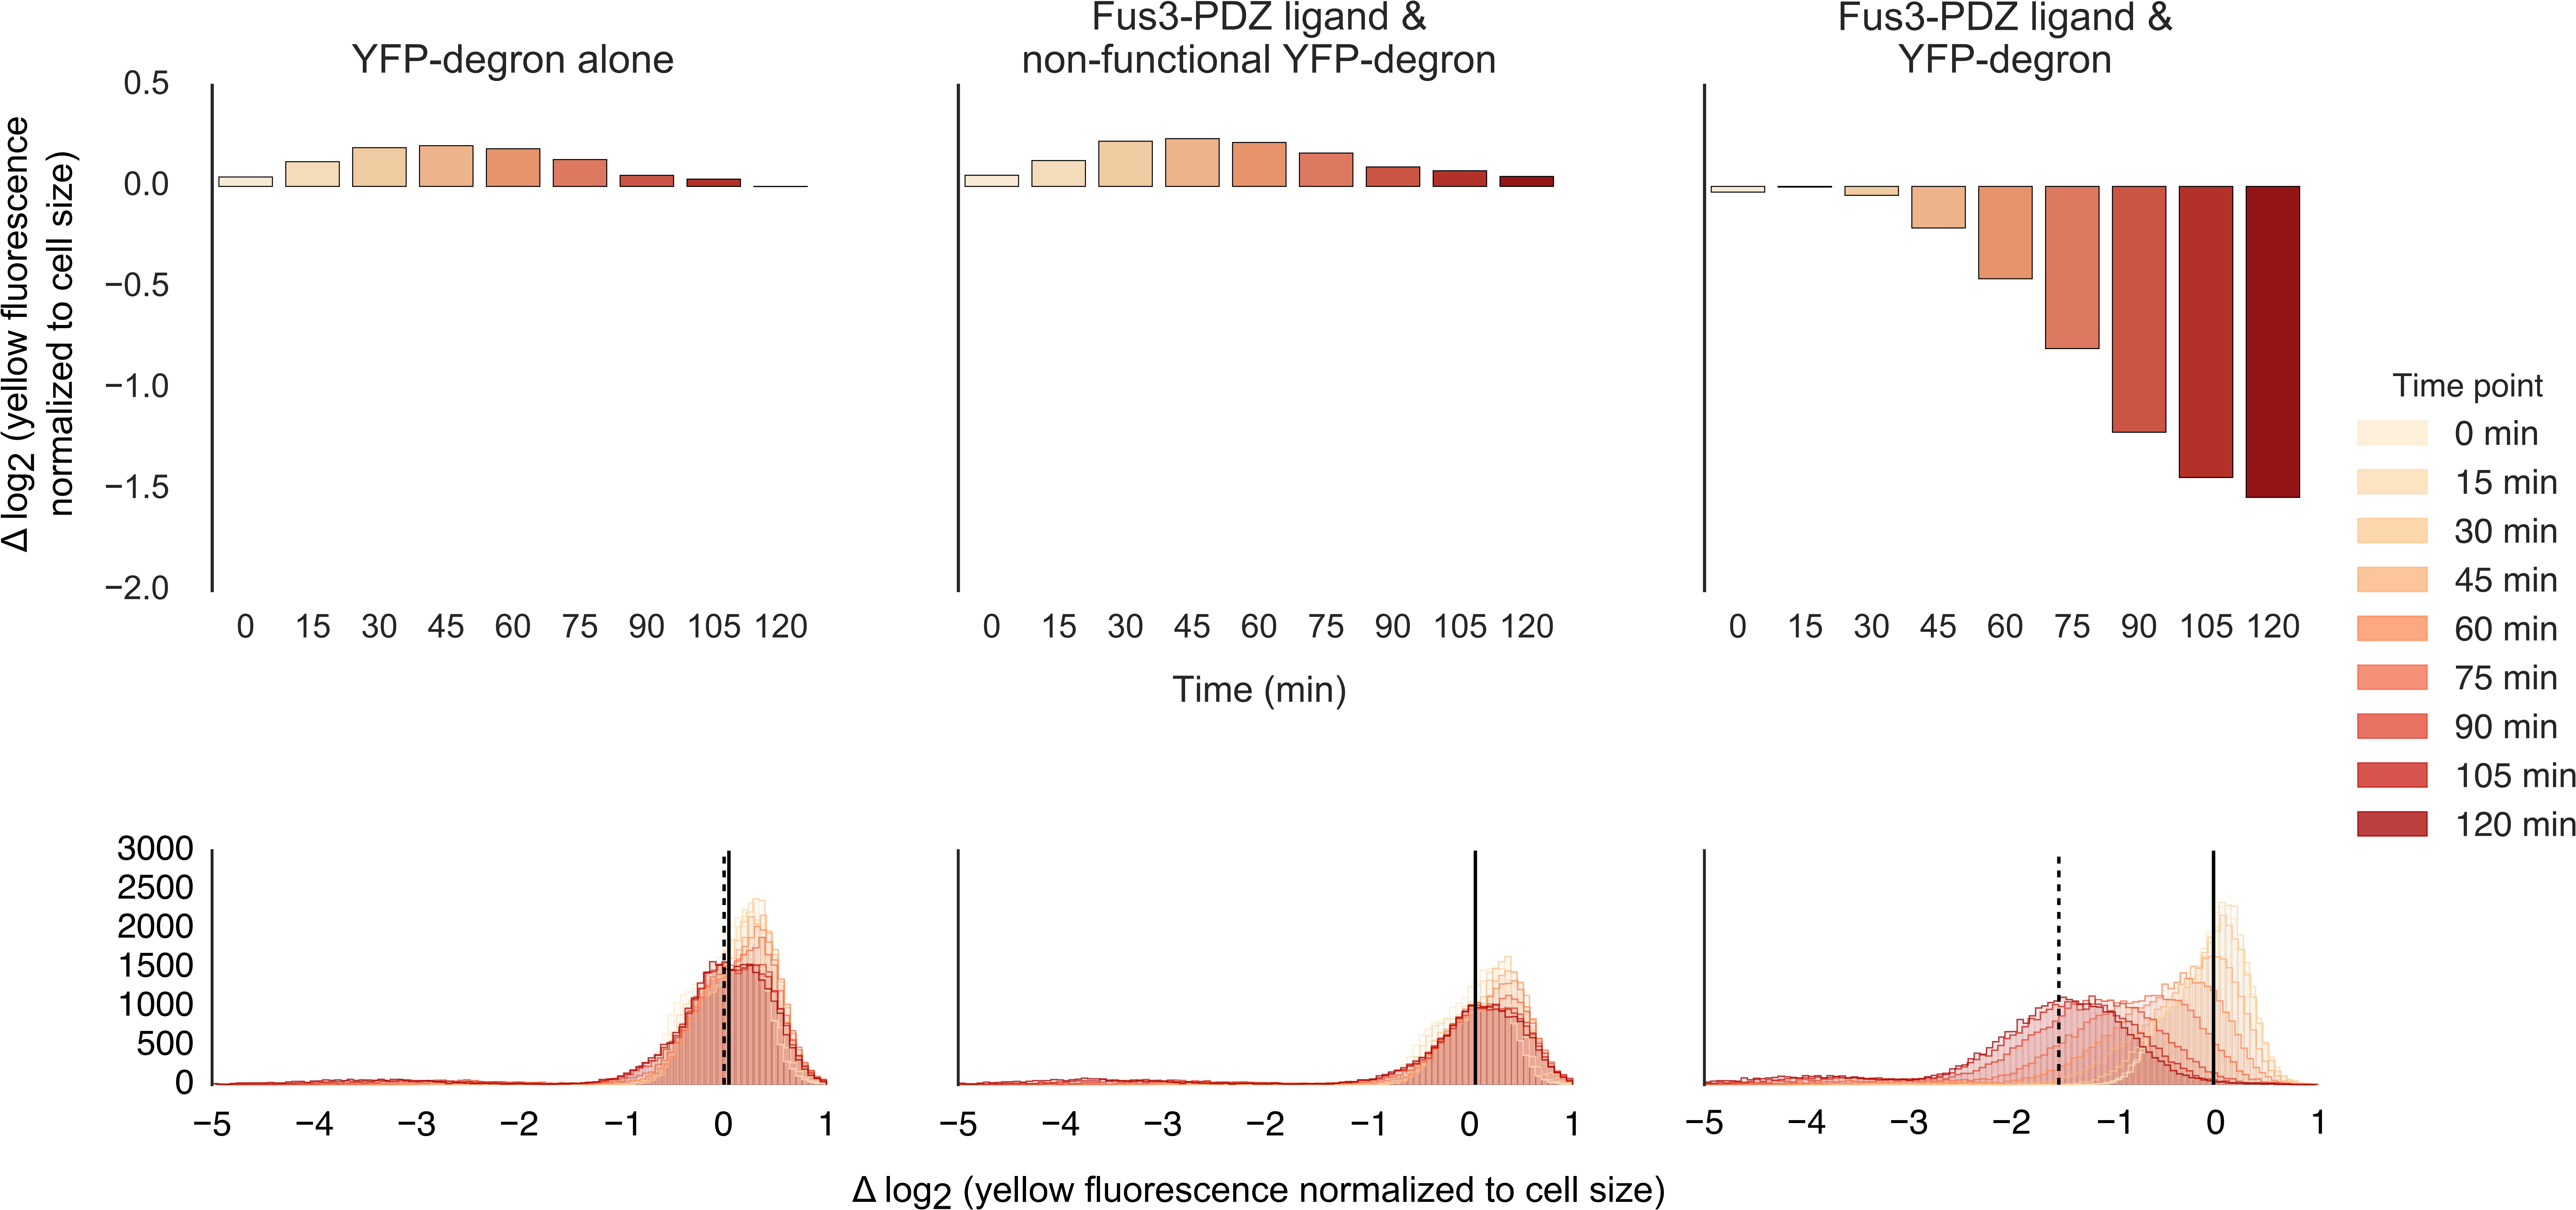

Supplement: supp [file elife_poa_e15200_Figure_1_Supplement_4.pdf › elife_poa_e15200_Figure_1_Supplement_4.pdf]

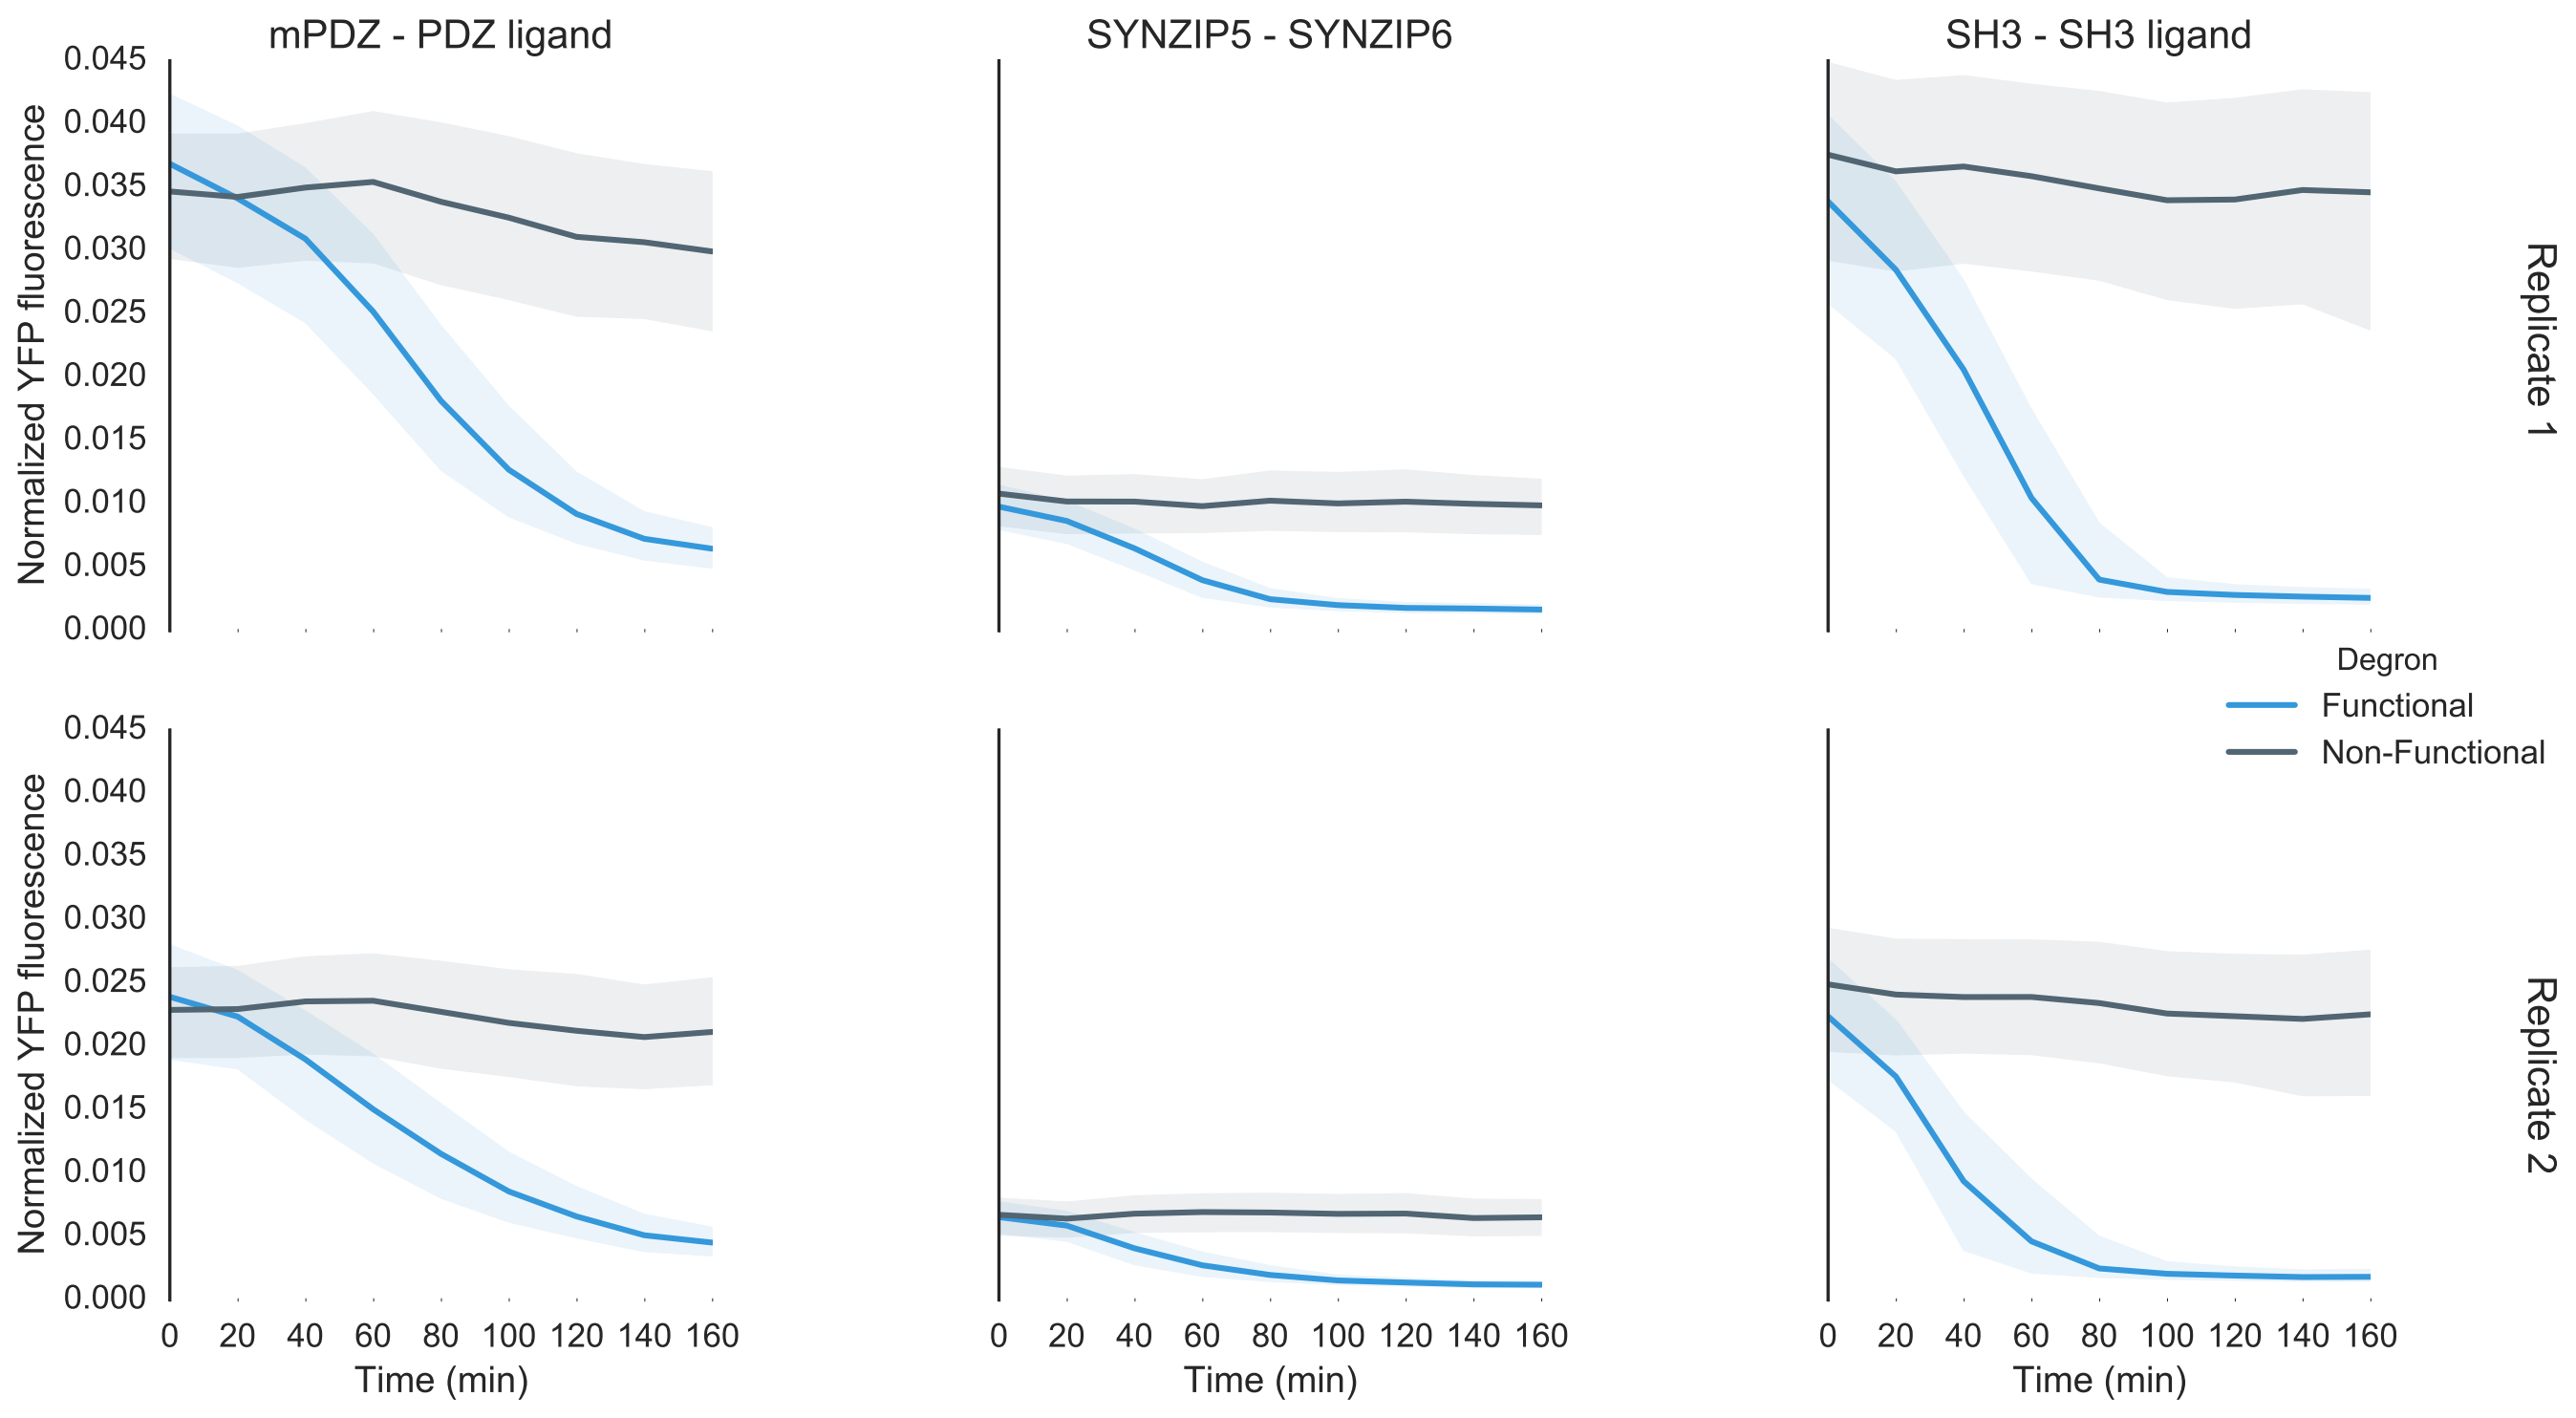

Supplement: supp [file elife_poa_e15200_Figure_2_Supplement_1.pdf › elife_poa_e15200_Figure_2_Supplement_1.pdf]

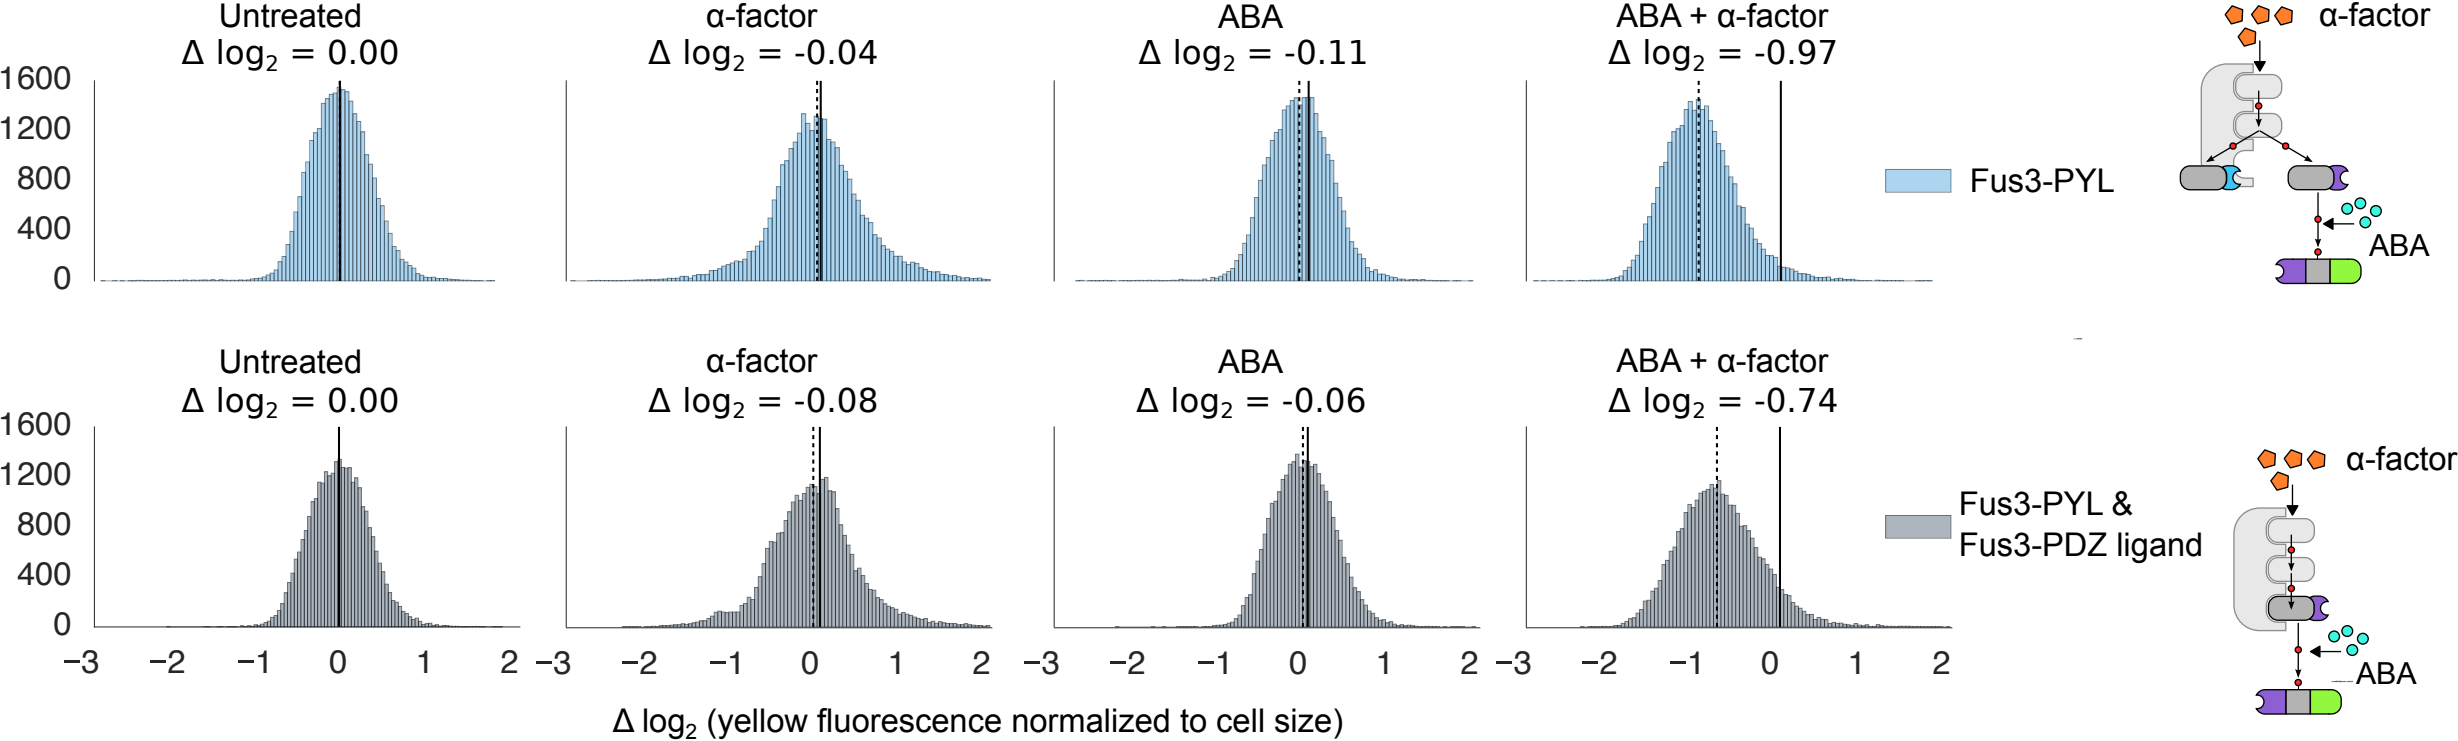

Supplement: supp [file elife_poa_e15200_Figure_3_Supplement_1.pdf › elife_poa_e15200_Figure_3_Supplement_1.pdf]

GFP-Tec1-mPDZ

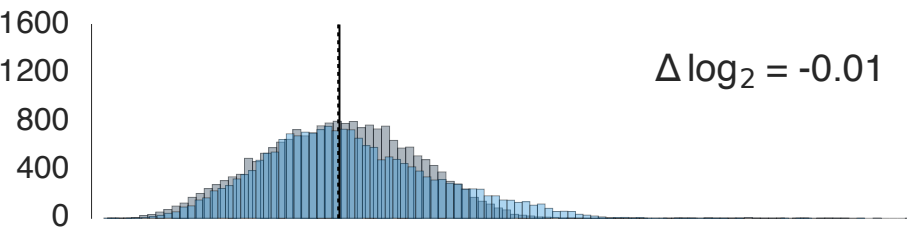

GFP-Tec1-mPDZ

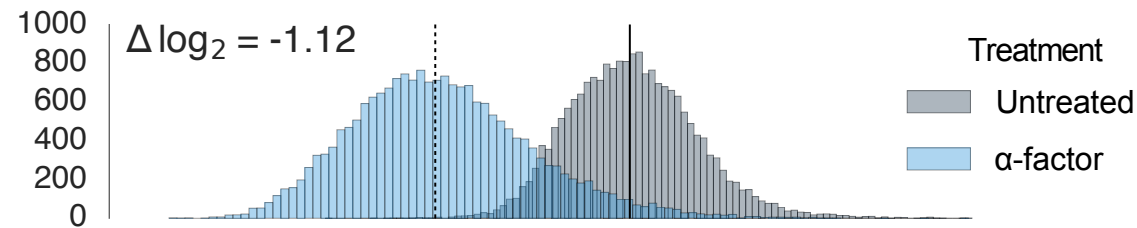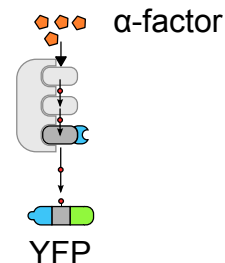

GFP-Tec1-mPDZ &amp; mCherry-Tec1-mPDZ

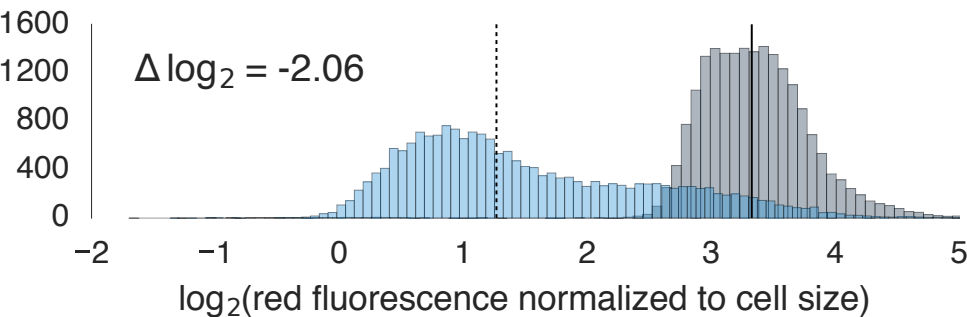

GFP-Tec1-mPDZ &amp; mCherry-Tec1-mPDZ

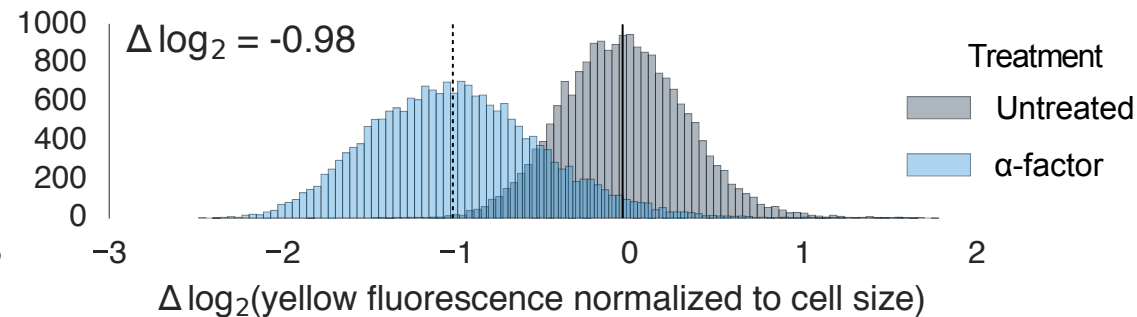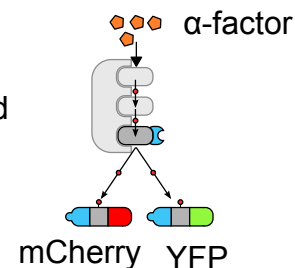

Supplement: supp [file elife_poa_e15200_Figure_3_Supplement_2.pdf › elife_poa_e15200_Figure_3_Supplement_2.pdf]

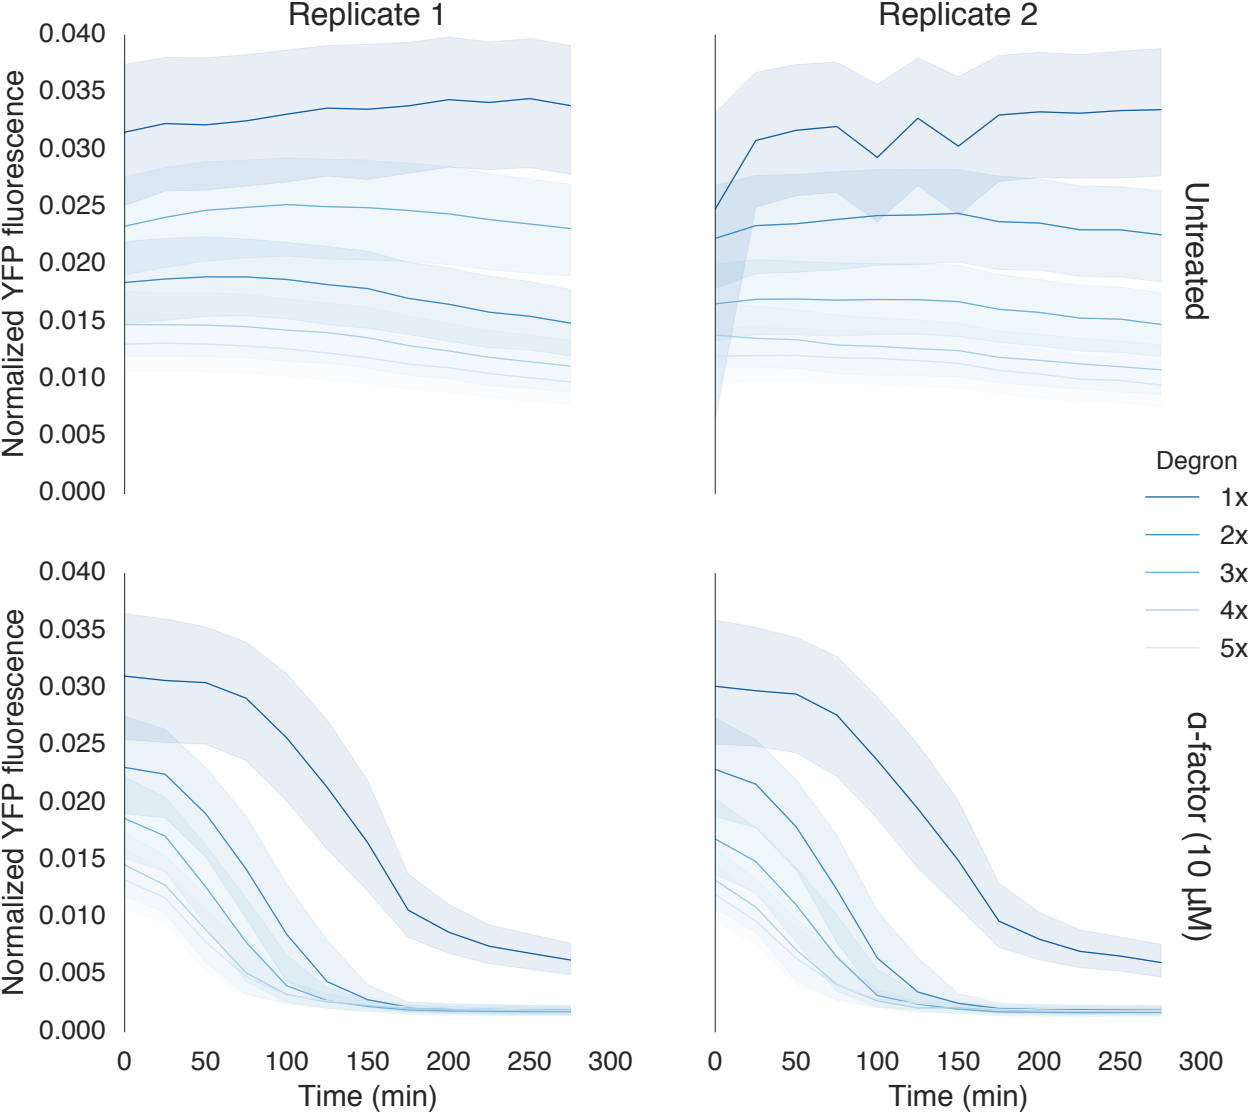

Supplement: supp [file elife_poa_e15200_Figure_4_Supplement_1.pdf › elife_poa_e15200_Figure_4_Supplement_1.pdf]

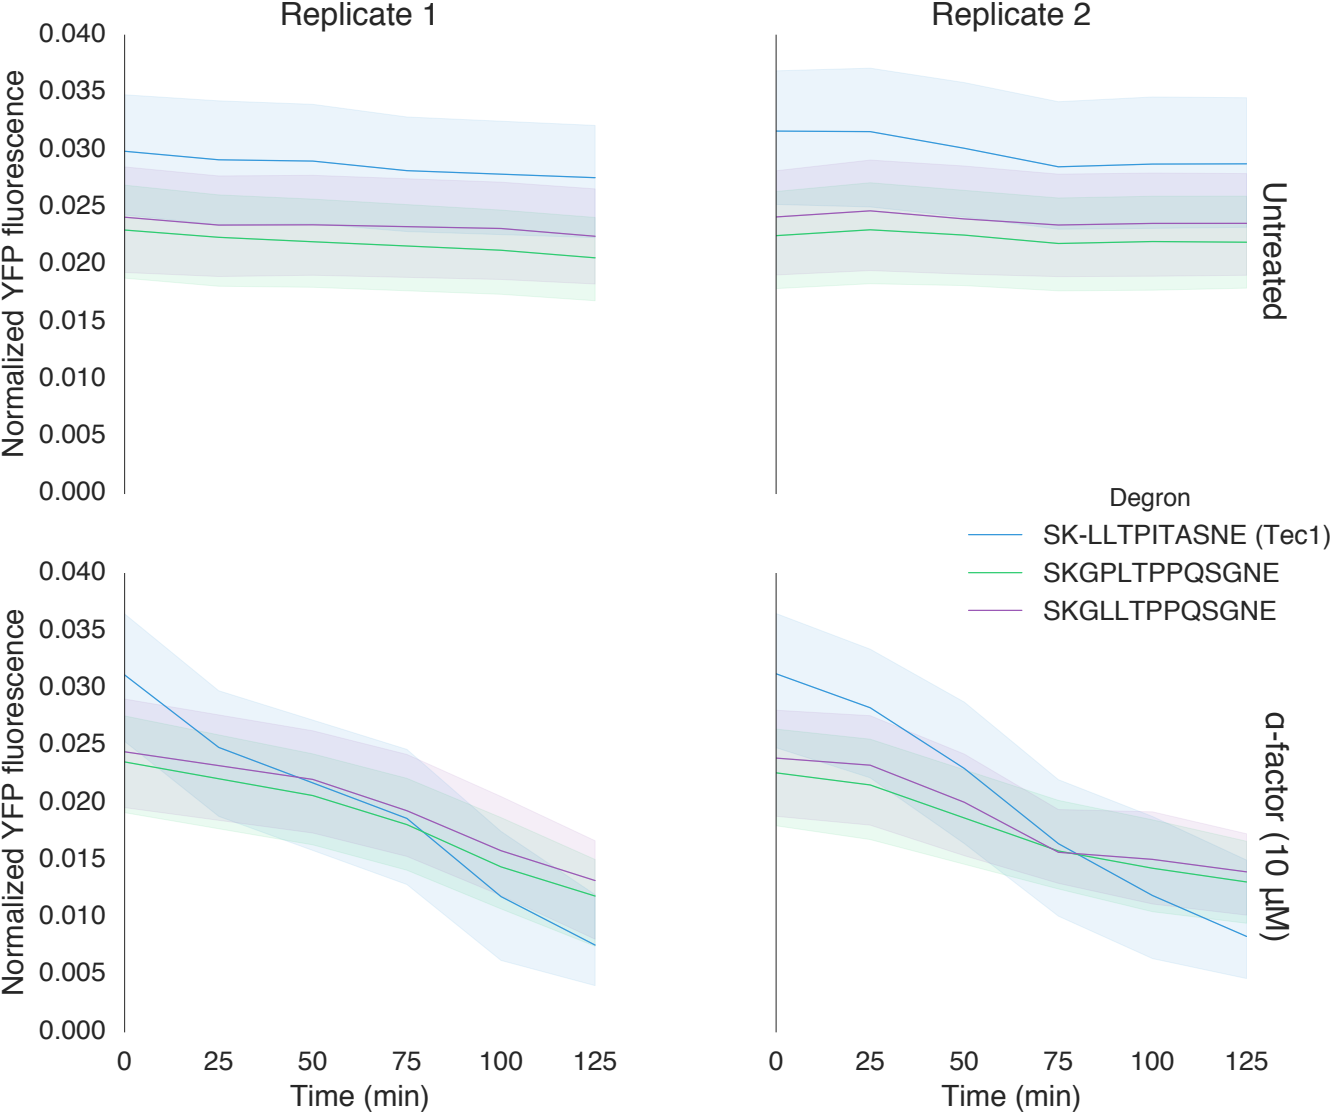

Supplement: supp [file elife_poa_e15200_Figure_4_Supplement_2.pdf › elife_poa_e15200_Figure_4_Supplement_2.pdf]

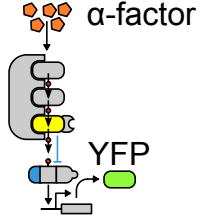

Target = Ste12

Normalized fluorescence

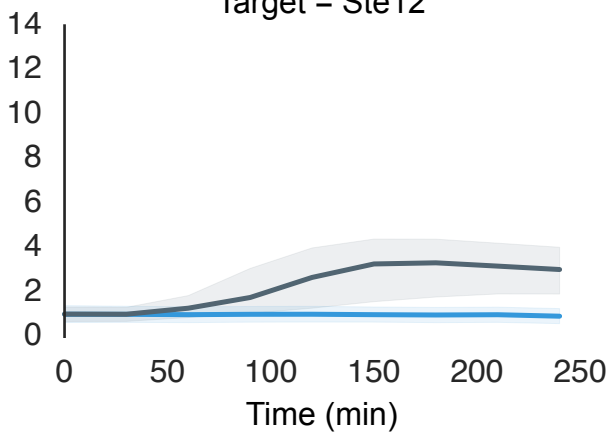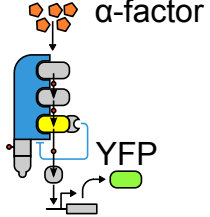

Target = Ste5

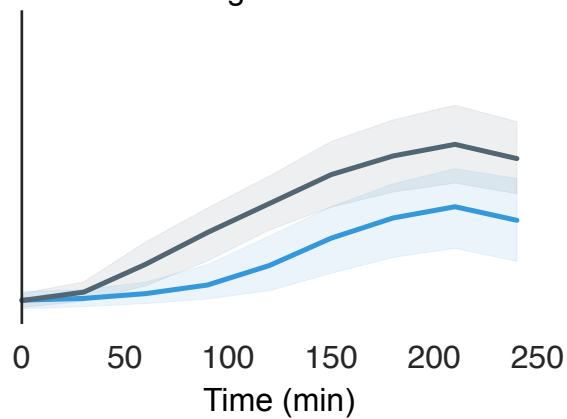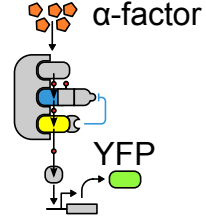

Target = Ste7

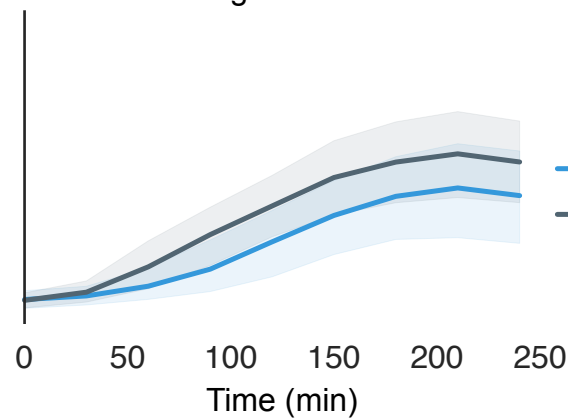

— Negative feedback  
— No feedback

Supplement: supp [file elife_poa_e15200_Figure_6_Supplement_1.pdf › elife_poa_e15200_Figure_6_Supplement_1.pdf]

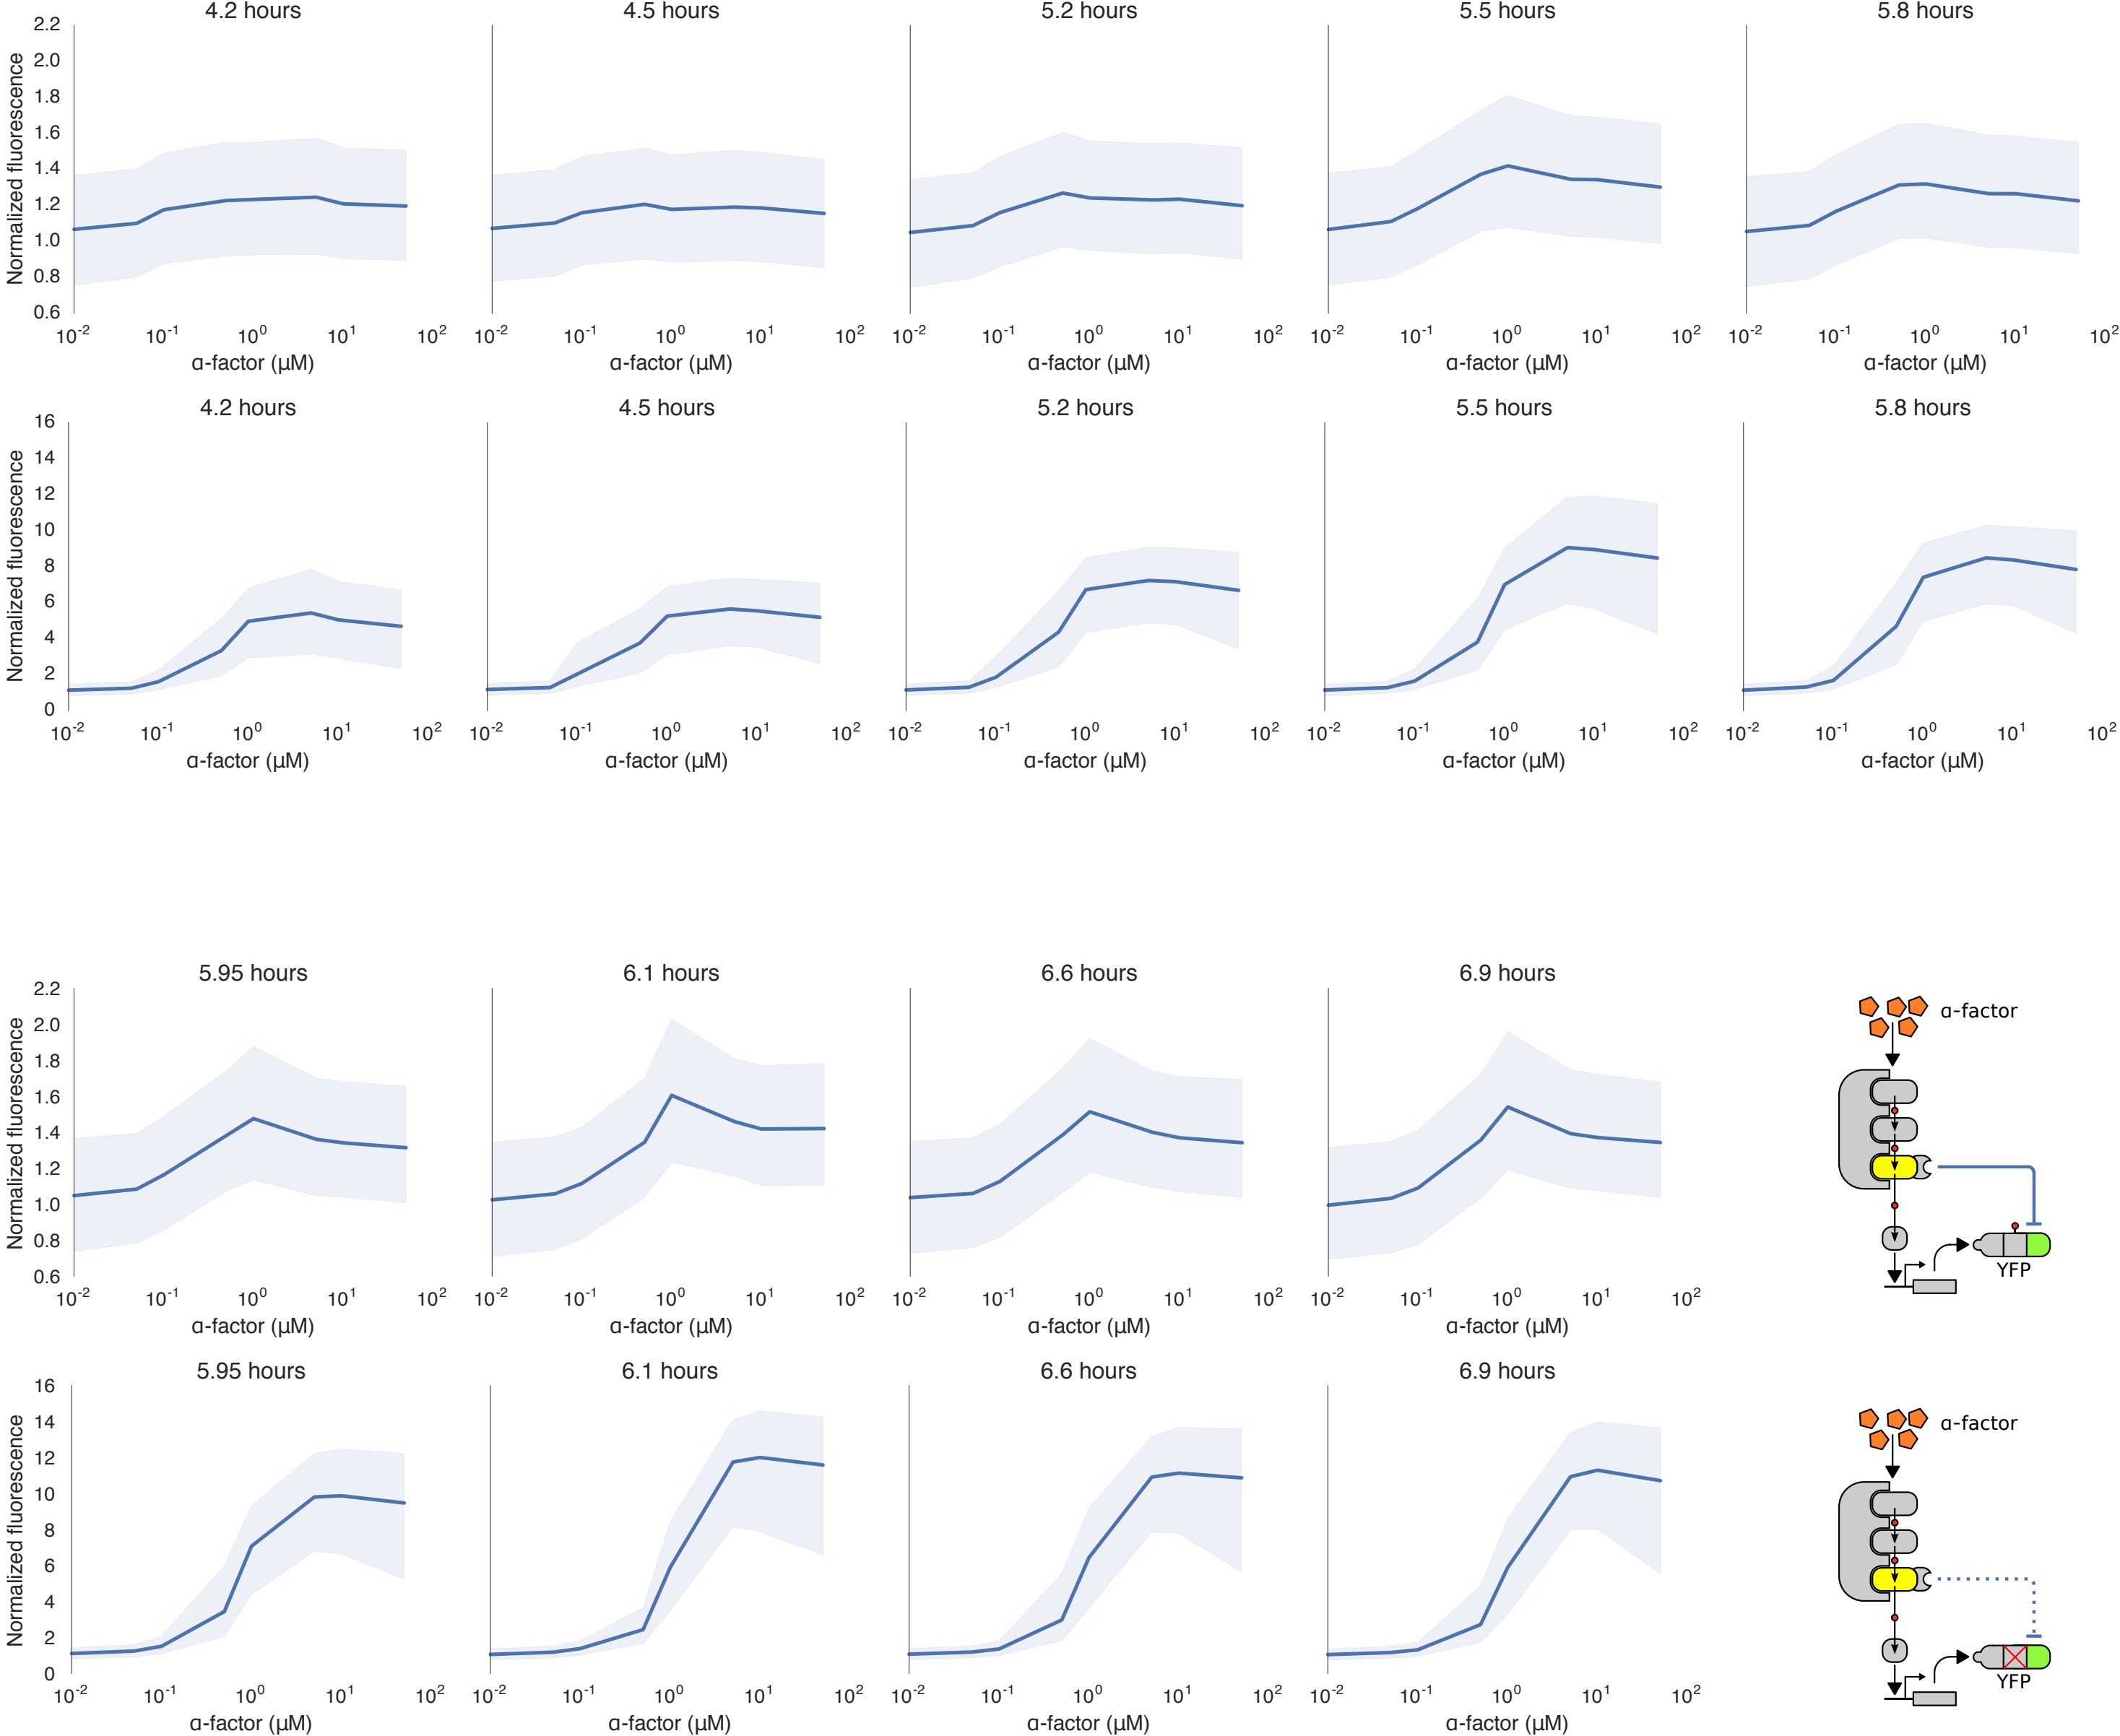

Supplement: supp [file elife_poa_e15200_Figure_7_Supplement_1.pdf › elife_poa_e15200_Figure_7_Supplement_1.pdf]
